# Supplementary material
Source: PubMed Central journal article supplement (PMC4793354)
Supplement: khah013126.wf1_default.pdf [file khah013126.wf1_default.pdf]

**NHS:**

**Physical Activity Assessment**

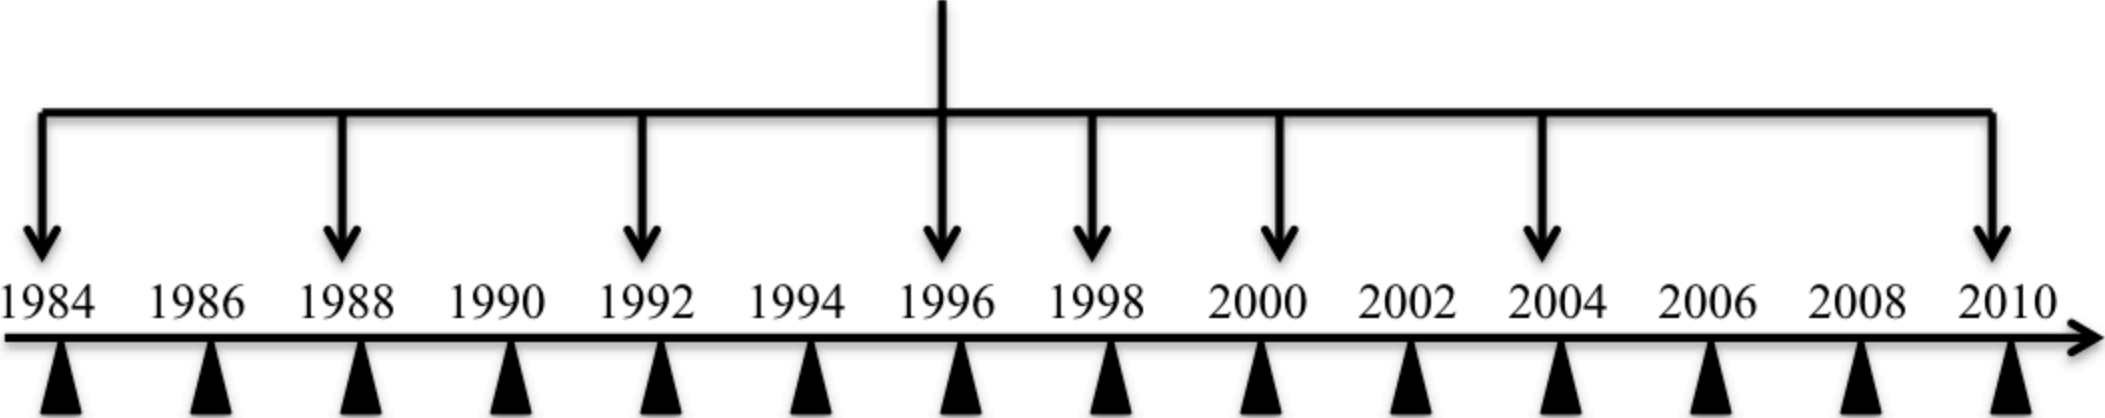

**NHS II:**

**Physical Activity Assessment**

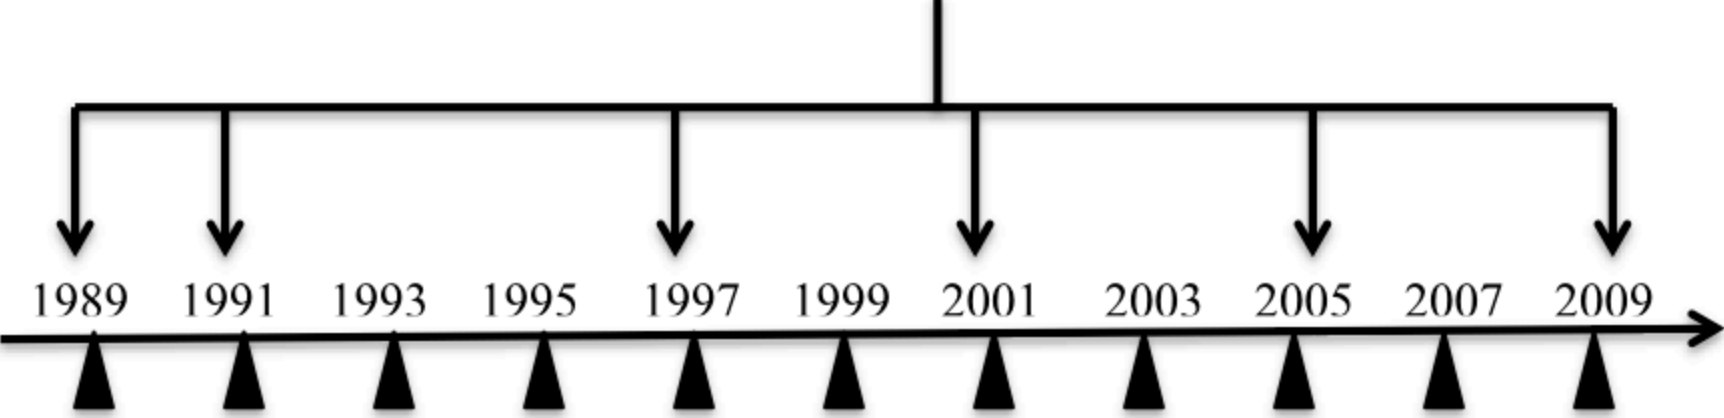

**Incident Cases of CD (n= 284) or UC (n= 363)**
